# Supplementary material
Source: publisher figshare collection journal article supplement (https://sage.figshare.com/ndownloader/files/15367721)
Supplement: Supplementary file 1 [file 15367721]

## Sheet: Sheet1
Appendix A: Variables Included by Model
Variable	Label	Category	All	Legal Only	Education	Structured Activity	Employment	Family Peer	DSHS	Substance Use	Mental Emotional	Rationale for Act	Temperament	Cognitive	Mined Model
D1Q1A1	Age at first offense:	Over 16
D1Q1A2	Age at first offense:	16	x
D1Q1A3	Age at first offense:	15	x
D1Q1A4	Age at first offense:	13 to 14	x
D1Q1A5	Age at first offense:	12 and under	x
D1Q2A1	Misdemeanor referrals:	none or one
D1Q2A2	Misdemeanor referrals:	two	x	x
D1Q2A3	Misdemeanor referrals:	three or four	x	x
D1Q2A4	Misdemeanor referrals:	five or more	x	x
D1Q3A1	Felony referrals:	none
D1Q3A2	Felony referrals:	one	x	x
D1Q3A3	Felony referrals:	two	x	x
D1Q3A4	Felony referrals:	three or more	x	x
D1Q4A1	Weapon referrals:	none	x												x
D1Q4A2	Weapon referrals:	one or more
D1Q5A1	Against-person misdemeanor referrals:	none
D1Q5A2	Against-person misdemeanor referrals:	one	x	x
D1Q5A3	Against-person misdemeanor referrals:	two or more	x	x
D1Q6A1	Against-person felony referrals:	none
D1Q6A2	Against-person felony referrals:	one or more	x	x
D1Q6A3	Against-person felony referrals:	three or more	x	x
D1Q7A1	Sexual misconduct misdemeanor referrals:	none
D1Q7A2	Sexual misconduct misdemeanor referrals:	one	x	x
D1Q7A3	Sexual misconduct misdemeanor referrals:	two or more	x	x
D1Q8A1	Felony sex offense referrals:	none	x	x
D1Q8A2	Felony sex offense referrals:	one
D1Q8A3	Felony sex offense referrals:	two or more	x	x											x
D1Q9A1	Confinements in detention where youth was held f	none
D1Q9A2	Confinements in detention where youth was held f	one	x	x
D1Q9A3	Confinements in detention where youth was held f	two	x	x
D1Q9A4	Confinements in detention where youth was held f	three or more	x	x
D1Q10A1	Commitment orders where youth served at least on	none
D1Q10A2	Commitment orders where youth served at least on	one	x	x											x
D1Q10A3	Commitment orders where youth served at least on	two or more	x	x
D1Q11A1	Escapes:	none
D1Q11A2	Escapes:	one	x
D1Q11A3	Escapes: Total number of attempted or actual es		x
D1Q12A1	Pick Up Orders for failure-to-appear in court or	none
D1Q12A2	Pick Up Orders for failure-to-appear in court or	one	x	x
D1Q12A3	Pick Up Orders for failure-to-appear in court or	two or more	x	x
D31Q1A1	Youth is a special education student or has diag	no special education need
D31Q1A2	Youth is a special education student or has diag	behavioral	x		x										x
D31Q1A3	Youth is a special education student or has diag	ADHD_ADD	x		x
D31Q1A4	Youth is a special education student or has diag	learning	x		x
D31Q1A5	Youth is a special education student or has diag	mental retardation	x		x
D31Q2A1	History of expulsions-out of school suspensions	no expel_suspend
D31Q2A2	History of expulsions-out of school suspensions	1 expel_suspend	x		x
D31Q2A3	History of expulsions-out of school suspensions	2 or 3	x		x
D31Q2A4	History of expulsions-out of school suspensions	4 or 5	x		x
D31Q2A5	History of expulsions-out of school suspensions	6 or 7	x		x
D31Q2A6	History of expulsions-out of school suspensions	more than 7	x		x
D31Q3A1	Age at first expulsion or suspension:	no expel_suspend
D31Q3A2	Age at first expulsion or suspension:	5 to 9 years old	x		x
D31Q3A3	Age at first expulsion or suspension:	10 to 13 years old	x		x
D31Q3A4	Age at first expulsion or suspension:	14 to 15 years old	x		x
D31Q3A5	Age at first expulsion or suspension:	16 to 18 years old	x		x
D31Q4A1	Youth has been enrolled in school past 6 months-	no, graduated_GED and not attending school, do not complete Domain 3B	x
D31Q4A2	Youth has been enrolled in school past 6 months-	No, dropped-out or expelled for more than six months, do not complete Domain 3B
D31Q4A3	Youth has been enrolled in school past 6 months-	yes, must complete Domain 3B
D32Q1A1	Youths current school enrollment status	Graduated, GED
D32Q1A2	Youths current school enrollment status	Enrolled full-time	x		x
D32Q1A3	Youths current school enrollment status	Enrolled part-time	x		x
D32Q1A4	Youths current school enrollment status	suspended	x		x
D32Q1A5	Youths current school enrollment status	Dropped out	x		x
D32Q1A6	Youths current school enrollment status	Expelled	x		x
D32Q2A1	Type of school in which youth is enrolled:	public academic
D32Q2A2	Type of school in which youth is enrolled:	vocational	x		x
D32Q2A3	Type of school in which youth is enrolled:	alternative	x		x
D32Q2A4	Type of school in which youth is enrolled:	GED program	x		x
D32Q2A5	Type of school in which youth is enrolled:	Private academic	x		x
D32Q2A6	Type of school in which youth is enrolled:	Home school	x		x
D32Q2A7	Type of school in which youth is enrolled:	College	x
D32Q2A8	Type of school in which youth is enrolled:	other	x		x
D32Q3A1	Youth believes there is value in getting an educ	believes getting an education is of value	x		x
D32Q3A2	Youth believes there is value in getting an educ	somewhat believes education is of value
D32Q3A3	Youth believes there is value in getting an educ	does not believe education is of value
D32Q4A1	Youth believes school provides an encouraging en	believes school is encouraging
D32Q4A2	Youth believes school provides an encouraging en	somewhat believes school is encouraging	x
D32Q4A3	Youth believes school provides an encouraging en	does not believe school is encouraging	x		x
D32Q5A1	Teachers-staff-coaches youth likes or feels comf	not close to any teachers, staff, or coaches
D32Q5A2	Teachers-staff-coaches youth likes or feels comf	close to 1	x		x										x
D32Q5A3	Teachers-staff-coaches youth likes or feels comf	close to 2	x		x
D32Q5A4	Teachers-staff-coaches youth likes or feels comf	close to 3	x		x
D32Q5A5	Teachers-staff-coaches youth likes or feels comf	close to 4	x		x
D32Q6A1	Youths involvement in school activities during m	involved in 2 or more activities
D32Q6A2	Youths involvement in school activities during m	involved in 1 activity	x		x
D32Q6A3	Youths involvement in school activities during m	interested but not involved in any activities	x		x										x
D32Q6A4	Youths involvement in school activities during m	not interested in school activities	x		x
D32Q7A1	Youths conduct in the most recent term:	recognition for good behavior
D32Q7A2	Youths conduct in the most recent term:	no problems with school conduct	x		x
D32Q7A3	Youths conduct in the most recent term:	problems reported by teachers	x		x
D32Q7A4	Youths conduct in the most recent term:	problem calls to parents	x		x
D32Q7A5	Youths conduct in the most recent term:	calls to police	x		x
D32Q8A1	Number of expulsions and suspensions in the most	no expel_suspend	x		x										x
D32Q8A2	Number of expulsions and suspensions in the most	1 expel_suspend	x		x
D32Q8A3	Number of expulsions and suspensions in the most	2 or 3 expel_suspend	x		x
D32Q8A4	Number of expulsions and suspensions in the most	more than 3
D32Q9A1	Youths attendance in the most recent term:	good attendance with few absences	x		x
D32Q9A2	Youths attendance in the most recent term:	no unexcused absences	x		x
D32Q9A3	Youths attendance in the most recent term:	some partial-day unexcused absences	x		x										x
D32Q9A4	Youths attendance in the most recent term:	some full-day unexcused absences	x		x
D32Q9A5	Youths attendance in the most recent term:	habitual truant
D32Q10A1	Youths academic performance in the most recent s	honor student (mostly As)	x		x
D32Q10A2	Youths academic performance in the most recent s	above 30 (mostly As and Bs)	x		x
D32Q10A3	Youths academic performance in the most recent s	20 to 30 (mostly Bs and Cs, no Fs)	x		x										x
D32Q10A4	Youths academic performance in the most recent s	10 to 20 (mostly Cs and Ds, some Fs)	x		x
D32Q10A5	Youths academic performance in the most recent s	Below 10 (some Ds and mostly Fs)
D32Q11A1	Interviewers assessment of likelihood of graduat	very likely to stay in school and graduate
D32Q11A2	Interviewers assessment of likelihood of graduat	uncertain if youth will stay and graduate	x		x
D32Q11A3	Interviewers assessment of likelihood of graduat	not very likely to stay and graduate	x		x	x
D41Q1A1	History of structured recreational activities	invovled in 2 or more structured activities	x			x
D41Q1A2	History of structured recreational activities:	involved in 1 strcutred activity
D41Q1A3	History of structured recreational activities:	never involved in structured activities
D41Q2A1	History of unstructured recreational activities:	invovled in 2 or more unstructured activities
D41Q2A2	History of unstructured recreational activities:	involved in 1 pro-social unstructured activity	x			x
D41Q2A3	History of unstructured recreational activities:	never involved in pro-social unstructured activities	x			x
D42Q1A1	Current interest-involvement in structured rec a	currently involved in 2 or more structured activities
D42Q1A2	Current interest-involvement in structured rec a	currently involved in 1 structured activity	x			x
D42Q1A3	Current interest-involvement in structured rec a	currenty interested but not involved	x			x
D42Q1A4	Current interest-involvement in structured rec a	not interested in any structured activities	x			x									x
D42Q2A1	Types of current structured recreational activit	no structured recreational activities
D42Q2A2	Types of current structured recreational activit	community_cultural group	x			x
D42Q2A3	Types of current structured recreational activit	hobby group or club	x			x									x
D42Q2A4	Types of current structured recreational activit	athletics	x			x
D42Q2A5	Types of current structured recreational activit	religious group_church	x			x
D42Q2A6	Types of current structured recreational activit	volunteer organization	x			x
D42Q3A1	Current interest-involvement in unstructured pro	currently invovled in 2 or more unstructured activities
D42Q3A2	Current interest-involvement in unstructured pro	currently involved in 1 unstructured activity	x			x
D42Q3A3	Current interest-involvement in unstructured pro	currently interested but not invovled in unstructured activities	x			x
D42Q3A4	Current interest-involvement in unstructured pro	not interested in any unstructured activities	x			x
D51Q1A1	History of employment:	too young for employment consideration
D51Q1A2	History of employment:	never been employed	x				x
D51Q1A3	History of employment:	has been employed	x				x
D51Q2A1	History of successful employment:	never successfully employed	x				x
D51Q2A2	History of successful employment:	has been successfully employed
D51Q3A1	History of problems while employed:	never fired or quit because of problems
D51Q3A2	History of problems while employed:	fired or quit because of poor performance	x				x
D51Q3A3	History of problems while employed:	fired or quit because he or she could not get along with employer or coworkers	x				x
D51Q4A1	History of positive relationship(s) with employe	never had any postive relationships	x				x
D51Q4A2	History of positive relationship(s) with employe	had 1 positive relationship
D51Q4A3	History of positive relationship(s) with employe	had 2 or more positive relationships
D52Q1A1	Understanding of what is required to maintain a	lacks knowledge of what it takes to maintain a job
D52Q1A2	Understanding of what is required to maintain a	has knowledge of abilities to maintain a job	x				x
D52Q1A3	Understanding of what is required to maintain a	had demonstrated ability to maintain a job	x				x								x
D52Q2A1	Current interest in employment:	currently employed
D52Q2A2	Current interest in employment:	not employed but highly interested in employment	x				x
D52Q2A3	Current interest in employment:	not employed but somewhat interested	x				x
D52Q2A4	Current interest in employment:	not employed and not interested in employment	x				x
D52Q2A5	Current interest in employment:	too young for employment consideration	x				x								x
D52Q3A1	Current employment status:	not currently employment
D52Q3A2	Current employment status:	employment is currently going well	x				x
D52Q3A3	Current employment status:	having problems with current employment	x				x
D52Q4A1	Current positive personal relationship(s) with e	not currently employed
D52Q4A2	Current positive personal relationship(s) with e	employed but no positive relationship
D52Q4A3	Current positive personal relationship(s) with e	at least 1 positive relationship
D61Q1A1	History of positive adult non-family relationshi	no positive adult relationships	x					x
D61Q1A2	History of positive adult non-family relationshi	1 positive adult relationship
D61Q1A3	History of positive adult non-family relationshi	2 positive adult relationships
D61Q1A4	History of positive adult non-family relationshi	3 or more positive adult relationships
D61Q2A1	History of anti-social friends_companions:	never had consistent friends or companions	x					x
D61Q2A2	History of anti-social friends_companions:	had pro-social friends
D61Q2A3	History of anti-social friends_companions:	had anti-social friends
D61Q2A4	History of anti-social friends_companions:	been a gang member_associate
D62Q1A1	Current positive adult non-family relationships	no positive adult relationships
D62Q1A2	Current positive adult non-family relationships	1 positive adult relationship	x					x
D62Q1A3	Current positive adult non-family relationships	2 positive adult relationships	x					x
D62Q1A4	Current positive adult non-family relationships	3 or more positive adult relationships	x					x
D62Q2A1	Current pro-social community ties:	no pro-social community ties
D62Q2A2	Current pro-social community ties:	some pro-social community ties	x					x
D62Q2A3	Current pro-social community ties:	has strong pro-social community ties	x					x
D62Q3A1	Current friends_companions youth actually spends	no consistent friends or companions
D62Q3A2	Current friends_companions youth actually spends	pro-social friends	x					x
D62Q3A3	Current friends_companions youth actually spends	anti-social friends	x					x							x
D62Q3A4	Current friends_companions youth actually spends	gang member_associate	x					x
D62Q4A1	Currently in a "romantic", intimate, or sexual rel	not romantically involved with anyone	x					x
D62Q4A2	Currently in a "romantic", intimate, or sexual rel	romantically involved with a pro-social person
D62Q4A3	Currently in a "romantic", intimate, or sexual rel	romantically involved with an anti-social person_criminal	x					x
D62Q5A1	Currently admires_emulates anti-social peers:	does not admire, emulate anti-social peers
D62Q5A2	Currently admires_emulates anti-social peers:	somewhat admires, emulates anti_social peers	x					x							x
D62Q5A3	Currently admires_emulates anti-social peers:	admires, emulates anti-social peers	x					x
D62Q6A1	Current resistance to anti-social peer influence	does not associate with anti-social friends	x					x
D62Q6A2	Current resistance to anti-social peer influence	usually resists going along with anti-social peers	x					x
D62Q6A3	Current resistance to anti-social peer influence	rarely resists goes along with anti-social peers	x					x
D62Q6A4	Current resistance to anti-social peer influence	leads anti-social peers
D71Q1A1	History of court-ordered or DSHS voluntary out-o	no out-of-home placements exceeding 30 days
D71Q1A2	History of court-ordered or DSHS voluntary out-o	1 out-of-home placement	x						x
D71Q1A3	History of court-ordered or DSHS voluntary out-o	2 out-of-home placement	x						x
D71Q1A4	History of court-ordered or DSHS voluntary out-o	3 or more out-of-home placements	x						x
D71Q2A1	History of runaways or times kicked out of home:	no history of running away or being kicked out
D71Q2A2	History of runaways or times kicked out of home:	1 instance of running away_kicked out	x						x
D71Q2A3	History of runaways or times kicked out of home:	2 to 3 instances of running away_kicked out	x						x
D71Q2A4	History of runaways or times kicked out of home:	4 to 5 instances of running away_kicked out	x						x
D71Q2A5	History of runaways or times kicked out of home:	over 5 instances of running away_kicked out	x						x
D71Q3A1	History of petitions filed:	no dependency petitions	x						x
D71Q3A2	History of petitions filed:	CINS_FINS
D71Q3A3	History of petitions filed:	dependency petitions filed
D71Q4A1	History of jail_imprisonment of persons who were	no jail_imprisonment history in family	x						x
D71Q4A2	History of jail_imprisonment of persons who were	mother_female caretaker
D71Q4A3	History of jail_imprisonment of persons who were	father_male caretaker
D71Q4A4	History of jail_imprisonment of persons who were	older sibling
D71Q4A5	History of jail_imprisonment of persons who were	younger sibling
D71Q4A6	History of jail_imprisonment of persons who were	other member
D71Q5A1	Youth is currently living under any adult superv	no, living with peers withut adult supervision, do not complete Domain 7B
D71Q5A2	Youth is currently living under any adult superv	no, living alone without adult supervision, do not complete Domain 7B	x						x
D71Q5A3	Youth is currently living under any adult superv	no, transient without adult supervision, do not complete Domain 7B	x						x
D71Q5A4	Youth is currently living under any adult superv	yes, living under adult supervision during last 4 weeks, must complete Domain 7B	x						x
D72Q1A1	All persons with whom youth is currently living:	living alone	x						x
D72Q1A2	All persons with whom youth is currently living:	transient (street, moving around)
D72Q1A3	All persons with whom youth is currently living:	biological mother	x						x
D72Q1A4	All persons with whom youth is currently living:	biological father	x						x						x
D72Q1A5	All persons with whom youth is currently living:	non-biological mother	x						x						x
D72Q1A6	All persons with whom youth is currently living:	non-biological father	x						x
D72Q1A7	All persons with whom youth is currently living:	older sibling	x						x
D72Q1A8	All persons with whom youth is currently living:	younger sibling	x						x
D72Q1A9	All persons with whom youth is currently living:	grandparent(s)	x						x
D72Q1A10	All persons with whom youth is currently living:	other relative(s)	x						x
D72Q1A11	All persons with whom youth is currently living:	long-term parental partner(s)	x						x
D72Q1A12	All persons with whom youth is currently living:	short-term parental partner(s)	x						x						x
D72Q1A13	All persons with whom youth is currently living:	youth romantic partner
D72Q1A14	All persons with whom youth is currently living:	youths child
D72Q1A15	All persons with whom youth is currently living:	foster_group home	x						x						x
D72Q1A16	All persons with whom youth is currently living:	youth friends
D72Q2A1	Annual combined income of youth and family:	under $15,000
D72Q2A2	Annual combined income of youth and family:	$15,000 to $34,999	x						x
D72Q2A3	Annual combined income of youth and family:	$35,000 to $49,999	x						x
D72Q2A4	Annual combined income of youth and family:	$50,000 and over	x						x
D72Q3A1	Jail_imprisonment history of persons who are cur	no one with history of being in jail_prison
D72Q3A2	Jail_imprisonment history of persons who are cur	mother_female caretaker	x						x
D72Q3A3	Jail_imprisonment history of persons who are cur	father_male caretaker	x						x
D72Q3A4	Jail_imprisonment history of persons who are cur	older sibling	x						x
D72Q3A5	Jail_imprisonment history of persons who are cur	younger sibling	x						x
D72Q3A6	Jail_imprisonment history of persons who are cur	other member	x						x
D72Q4A1	Problem history of parents who are currently inv	no problem history of parents in household	x						x
D72Q4A2	Problem history of parents who are currently inv	parental alcohol problem history
D72Q4A3	Problem history of parents who are currently inv	parental drug problem history
D72Q4A4	Problem history of parents who are currently inv	parental mental health problem history
D72Q4A5	Problem history of parents who are currently inv	parental physical health problem history
D72Q4A6	Problem history of parents who are currently inv	parental employment history
D72Q5A1	Problem history of siblings who are currently in	no siblings currently in household
D72Q5A2	Problem history of siblings who are currently in	no problem history of siblings in household	x						x
D72Q5A3	Problem history of siblings who are currently in	sibling alcohol problem history	x						x
D72Q5A4	Problem history of siblings who are currently in	sibiling drug problem history	x						x
D72Q5A5	Problem history of siblings who are currently in	sibling mental health problem history	x						x
D72Q5A6	Problem history of siblings who are currently in	sibling physial health problem history	x						x
D72Q5A7	Problem history of siblings who are currently in	sibling employment problem history	x						x
D72Q6A1	Support network for family:	no support network	x						x
D72Q6A2	Support network for family:	some support network
D72Q6A3	Support network for family:	strong support network
D72Q7A1	Family willingness to help support youth:	consistently willing to support youth
D72Q7A2	Family willingness to help support youth:	inconsistently willing to support youth	x						x
D72Q7A3	Family willingness to help support youth:	little or no willingness to support youth	x						x
D72Q7A4	Family willingness to help support youth:	hostile, berating, and_or belittling of youth	x						x
D72Q8A1	Family provides opportunities for youth to parti	no opportunities for invovlement provided	x						x
D72Q8A2	Family provides opportunities for youth to parti	some opportunities for involvement provided
D72Q8A3	Family provides opportunities for youth to parti	opportunities for involvement provided
D72Q9A1	Youth has run away or been kicked out of home:	has not run away_kicked out of home
D72Q9A2	Youth has run away or been kicked out of home:	has run away_kicked out within last 4 weeks	x						x
D72Q9A3	Youth has run away or been kicked out of home:	is currently kicked out of home or is a runaway	x						x
D72Q10A1	Family member(s) youth feels close to or has goo	does not feel close to any family member
D72Q10A2	Family member(s) youth feels close to or has goo	feels close to mother_female caretaker	x						x
D72Q10A3	Family member(s) youth feels close to or has goo	feels close to father_male caretaker	x						x
D72Q10A4	Family member(s) youth feels close to or has goo	feels close to male sibling	x						x
D72Q10A5	Family member(s) youth feels close to or has goo	feels close to female sibling	x						x
D72Q10A6	Family member(s) youth feels close to or has goo	feels close to extended family	x						x
D72Q11A1	Level of conflict between parents, between youth	some conflict that is well managed
D72Q11A2	Level of conflict between parents, between youth	verbal intimidation, yelling, heated arguments	x						x
D72Q11A3	Level of conflict between parents, between youth	threats of physical abuse	x						x
D72Q11A4	Level of conflict between parents, between youth	domestic violence: physical_sexual abuse	x						x
D72Q12A1	Parental supervision:	consistent supervision
D72Q12A2	Parental supervision:	sporadic supervision	x						x
D72Q12A3	Parental supervision:	inaequate supervision	x						x
D72Q13A1	Parental authority and control:	youth usually obeys and follows rules
D72Q13A2	Parental authority and control:	youth sometimes obeys or obeys some rules	x						x
D72Q13A3	Parental authority and control:	youth consistently disobeys and_or is hostile	x						x
D72Q14A1	Consistent appropriate punishment for bad behavi	consistently appropriate punishment
D72Q14A2	Consistent appropriate punishment for bad behavi	consistently overly severe punishment	x						x
D72Q14A3	Consistent appropriate punishment for bad behavi	consistently insufficient punishment	x						x
D72Q14A4	Consistent appropriate punishment for bad behavi	inconsistent or erratic punishment	x						x
D72Q15A1	Consistent appropriate rewards for good behavior	consistently appropriate rewards	x						x
D72Q15A2	Consistent appropriate rewards for good behavior	consistently overly indulgent_overly protective
D72Q15A3	Consistent appropriate rewards for good behavior	consistently insufficient rewards
D72Q15A4	Consistent appropriate rewards for good behavior	inconsistent or erratic rewards
D72Q16A1	Parental characterization of youths anti-social behavior	disapproves of youths anti-social behavior	x						x
D72Q16A2	Parental characterization of youths anti-social behavior	minimizes, denies, justifies, excuses behavior, or blames others_circumstances
D72Q16A3	Parental characterization of youths anti-social behavior	accepts youths anti-social behavior as okay	x						x
D72Q16A4	Parental characterization of youths anti-social behavior	proud of youths anti-social behavior	x						x
D81Q1A1	History of alcohol use:	no use of alcohol
D81Q1A2	History of alcohol use:	past use of alcohol	x							x
D81Q1A3	History of alcohol use:	alcohol disrupted education	x							x
D81Q1A4	History of alcohol use:	alcohol caused family conflict	x							x
D81Q1A5	History of alcohol use:	alcohol interfered with keeping pro-social friends	x							x
D81Q1A6	History of alcohol use:	alcohol caused health problems	x							x
D81Q1A7	History of alcohol use:	alcohol contributed to criminal behavior	x							x
D81Q1A8	History of alcohol use:	youth needs increasing amounts of alcohol to achieve same level of intoxication or high	x							x
D81Q1A9	History of alcohol use:	youth experiences withdrawal problems	x							x
D81Q2A1	History of drug use:	no past drug use	x							x
D81Q2A2	History of drug use:	past drug use
D81Q2A3	History of drug use:	drugs disrupted education
D81Q2A4	History of drug use:	drugs caused family conflict
D81Q2A5	History of drug use:	drugs interfered with keeping pro-social friends
D81Q2A6	History of drug use:	drugs caused health problems
D81Q2A7	History of drug use:	drugs contributed to criminal behavior
D81Q2A8	History of drug use:	youth needs increasing amounts of drugs to achieve same level of intoxication or high
D81Q2A9	History of drug use:	youth experiences withdrawal problems
D81Q3A1	History of referrals for drug_alcohol assessment	never referred for drug_alcohol assessment
D81Q3A2	History of referrals for drug_alcohol assessment	referred but never assessed	x							x
D81Q3A3	History of referrals for drug_alcohol assessment	diagnosed as no problem	x							x
D81Q3A4	History of referrals for drug_alcohol assessment	diagnosed as abuse	x							x
D81Q3A5	History of referrals for drug_alcohol assessment	diagnosed as dependent_addicted	x							x
D81Q4A1	History of attending drug_alcohol education class	never attended drug_alcohol education classes
D81Q4A2	History of attending drug_alcohol education class	voluntarily attended drug_alcohol education classes	x							x
D81Q4A3	History of attending drug_alcohol education class	attended classes by parent, school, or other agency request	x							x
D81Q4A4	History of attending drug_alcohol education class	attended classes at court direction	x							x
D81Q5A1	History of participating in drug_alcohol treatment	never participated in treatment program
D81Q5A2	History of participating in drug_alcohol treatment	participated once in treatment program	x							x
D81Q5A3	History of participating in drug_alcohol treatment	participated several times in treatment programs	x							x
D81Q6A1	Youth is currently using alchohol or drugs:	no, do not complete Domain 8B
D81Q6A2	Youth is currently using alchohol or drugs:	yes, must complete Domain 8B
D82Q1A1	Current alcohol use:	not currently using alcohol	x							x
D82Q1A2	Current alcohol use:	currently using alcohol
D82Q1A3	Current alcohol use:	alcohol disrupts education
D82Q1A4	Current alcohol use:	alcohol causes family conflict
D82Q1A5	Current alcohol use:	alcohol interferes with keeping pro-social friends
D82Q1A6	Current alcohol use:	alcohol causes health problems
D82Q1A7	Current alcohol use:	alcohol contributes to criminal behavior
D82Q1A8	Current alcohol use:	youth needs increasing amounts of alcohol to achieve same level of intoxication or high
D82Q1A9	Current alcohol use:	youth experiences withdrawal problems
D82Q2A1	Current drug use:	not currently using drugs
D82Q2A2	Current drug use:	currently using drugs
D82Q2A3	Current drug use:	drugs disrupts education
D82Q2A4	Current drug use:	drugs cause family conflict
D82Q2A5	Current drug use:	drugs interfere with keeping pro-social friends
D82Q2A6	Current drug use:	drugs cause health problems
D82Q2A7	Current drug use:	drugs contribute to criminal behavior
D82Q2A8	Current drug use:	youth needs increasing amounts of drugs to achieve same level of intoxication or high
D82Q2A9	Current drug use:	youth experiences withdrawal problems
D82Q3A1	Current type(s) of drugs used:	no current drug use	x							x
D82Q3A2	Current type(s) of drugs used:	marijuana_hashish
D82Q3A3	Current type(s) of drugs used:	amphetamines (Meth_Uppers_Speed_Ecstasy)
D82Q3A4	Current type(s) of drugs used:	cocaine (Coke)
D82Q3A5	Current type(s) of drugs used:	cocaine (Crack_Rock)
D82Q3A6	Current type(s) of drugs used:	heroin
D82Q3A7	Current type(s) of drugs used:	inhalants (glue_gasoline)
D82Q3A8	Current type(s) of drugs used:	barbiturates (Tuinal_Seconal_downers)
D82Q3A9	Current type(s) of drugs used:	tranquilizers_sedativies (Valium_Libnum_Dalmane_Ketamine)
D82Q3A10	Current type(s) of drugs used:	hallucinogens (LSD_Acid_Mushrooms_GHB)
D82Q3A11	Current type(s) of drugs used:
D82Q3A12	Current type(s) of drugs used:	other opiates (Dilauid_demerol_Percodan_Codeine_Oxycotin)
D82Q3A13	Current type(s) of drugs used:	other drugs
D82Q4A1	Current Drug_alcohol treatment program participa	alcohol_drug treatment not warranted
D82Q4A2	Current Drug_alcohol treatment program participa	not currently attending needed treatment program	x							x
D82Q4A3	Current Drug_alcohol treatment program participa	currently attending treatment program	x							x
D82Q4A4	Current Drug_alcohol treatment program participa	successfully completed treatment program	x							x
D91Q1A1	History of suicidal ideation:	has never thought about suicide
D91Q1A2	History of suicidal ideation:	has had serious thoughts about suicide	x								x
D91Q1A3	History of suicidal ideation:	has made a plan to commit suicide	x								x
D91Q1A4	History of suicidal ideation:	has attempted to commit suicide	x								x
D91Q1A5	History of suicidal ideation:	feels life is not worth living -- no hope for future	x								x
D91Q1A6	History of suicidal ideation:	knows someone well who has committed suicide	x								x				x
D91Q1A7	History of suicidal ideation:	engages in self-mutilating behavior	x								x
D91Q2A1	History of violence_physical abuse:	not a victim of physical abuse
D91Q2A2	History of violence_physical abuse:	victimized by family member	x								x
D91Q2A3	History of violence_physical abuse:	victimized by someone outside the family	x								x
D91Q2A4	History of violence_physical abuse:	victim of violence_physical abuse at home	x								x
D91Q2A5	History of violence_physical abuse:	victim of violence_physical abuse in a foster_group home	x								x
D91Q2A6	History of violence_physical abuse:	attacked with a weapon	x								x
D91Q3A1	History of witnessing violence:	has not witnessed violence	x								x
D91Q3A2	History of witnessing violence:	has witnessed violence
D91Q3A3	History of witnessing violence:	has witnessed violence in a foster_group home
D91Q3A4	History of witnessing violence:	has witnessed violence in the community
D91Q3A5	History of witnessing violence:	family member killed as a result of violence
D91Q4A1	History of sexual abuse_rape:	not a victim of sexual abuse_rape
D91Q4A2	History of sexual abuse_rape:	sexually abused_raped by family member	x								x
D91Q4A3	History of sexual abuse_rape:	sexually abused_raped by someone outside the family	x								x
D91Q5A1	History of being a victim of neglect:	not a victim of neglect	x								x				x
D91Q5A2	History of being a victim of neglect:	victim of neglect
D91Q6A1	History of ADD_ADHD: Confirmed by a professional	no history of ADD_ADHD
D91Q6A2	History of ADD_ADHD: Confirmed by a professional	diagnosed with ADD_ADHD	x								x
D91Q6A3	History of ADD_ADHD: Confirmed by a professional	only ADD_ADHD medication prescribed	x								x
D91Q6A4	History of ADD_ADHD: Confirmed by a professional	only ADD_ADHD treatment prescribed	x								x
D91Q6A5	History of ADD_ADHD: Confirmed by a professional	ADD_ADHD medication and treatment prescribed	x								x
D91Q7A1	History of mental health problems:	no history of mental health problem(s)
D91Q7A2	History of mental health problems:	diagnosed with mental health problem(s)	x								x
D91Q7A3	History of mental health problems:	only mental health medication prescribed	x								x
D91Q7A4	History of mental health problems:	only mental health treatment prescribed	x								x
D91Q7A5	History of mental health problems:	mental health medication and treatment prescribed	x								x
D91Q7A6	History of mental health problems: (PRE ONLY)
D91Q8A1	History of Anger or Irritability:	no history of anger_irritability
D91Q8A2	History of Anger or Irritability:	history of occasional feelings of anger	x								x
D91Q8A3	History of Anger or Irritability:	history of consistent feelings of anger_irritability	x								x
D91Q8A4	History of Anger or Irritability:	history of aggressive reactions to feelings of frustration or irritablity	x								x
D91Q9A1	History of Depression_Anxiety	no history of depression_anxiety
D91Q9A2	History of Depression_Anxiety	history of occasional feelings of depression_anxiety	x								x
D91Q9A3	History of Depression_Anxiety	history of consistent feelings of depression_anxiety	x								x
D91Q9A4	History of Depression_Anxiety	history of impairment in every day tasks due to depression_anxiety	x								x
D91Q10A1	History of Somatic Complaints:	no history of somatic complaints
D91Q10A2	History of Somatic Complaints:	history of one or two somatic complaints	x								x
D91Q10A3	History of Somatic Complaints:	history of three or four somatic complaints	x								x
D91Q10A4	History of Somatic Complaints:	history of five or more somatic complaints	x								x
D91Q11A1	History of Thought Disturbance	no unusual thoughts or beliefs
D91Q11A2	History of Thought Disturbance	presence of hallucinations (auditory or visual)	x								x				x
D91Q11A3	History of Thought Disturbance	presence of beliefs that the youth is controlled by others or others control the youth	x								x
D91Q12A1	History of Traumatic Experience: Lifetime	no presence of traumatic event
D91Q12A2	History of Traumatic Experience: Lifetime	presence of traumatic event	x								x
D91Q12A3	History of Traumatic Experience: Lifetime	flashbacks to traumatic event	x								x
D91Q13A1	Currently has health insurance:	no health insurance	x								x
D91Q13A2	Currently has health insurance:	public insurance
D91Q13A3	Currently has health insurance:	privant insurance
D91Q14A1	Current mental health problem status:	no current mental health problem(s), do not complete Domain 9B
D91Q14A2	Current mental health problem status:	current mental health problem(s), must complete Domain 9B
D92Q1A1	Current suicidal ideation:	has had thoughts about suicide
D92Q1A2	Current suicidal ideation:	has had serious thoughts about suicide	x								x
D92Q1A3	Current suicidal ideation:	has made a plan to commit suicide If yes, describe	x								x
D92Q1A4	Current suicidal ideation:	has attempted to commit suicide If yes, descibe attempt(s) and date(s)	x								x
D92Q1A5	Current suicidal ideation:	feels life is not worth living -- no hope for future	x								x
D92Q1A6	Current suicidal ideation:	knows someone well who has committed suicide If yes, who, when and how	x								x
D92Q1A7	Current suicidal ideation:	engages in self-mutilating behavior	x								x
D92Q2A1	Currently diagnosed with ADD_ADHD:	current ADD_ADHD diagnosis
D92Q2A2	Currently diagnosed with ADD_ADHD:	ADD_ADHD medication currently prescribed	x								x				x
D92Q2A3	Currently diagnosed with ADD_ADHD:	currently taking ADD_ADHD medication	x								x				x
D92Q2A4	Currently diagnosed with ADD_ADHD:	ADD_ADHD medication currently prescribed, but not taking	x								x
D92Q3A1	Mental health treatment currently prescribed exc	current mental health problem
D92Q3A2	Mental health treatment currently prescribed exc	mental health treatment currently prescribed	x								x
D92Q3A3	Mental health treatment currently prescribed exc	attending mental health treatment	x								x
D92Q3A4	Mental health treatment currently prescribed exc	treatment currently prescribed, but not attending	x								x
D92Q4A1	Mental health meds currently prescribed exclude	current mental health problem	x								x
D92Q4A2	Mental health meds currently prescribed exclude	mental health medication currently prescribed
D92Q4A3	Mental health meds currently prescribed exclude	currently taking mental health medication
D92Q4A4	Mental health meds currently prescribed exclude	mental health medication currently prescribed, but not taking
D92Q5A1	Mental health problems currently interfere with	current mental health problem
D92Q5A2	Mental health problems currently interfere with	mental health problem(s) does not interfere in work with youth	x								x
D92Q5A3	Mental health problems currently interfere with	mental health problem(s) interfere in work with youth	x								x
D10Q1A1	Primary emotion when committing crime(s):	nervous, afraid, worried, ambivalent, uncertian, or indecisive
D10Q1A2	Primary emotion when committing crime(s):	hyper, excited, or stimulated	x									x
D10Q1A3	Primary emotion when committing crime(s):	unconcerned or indifferent	x									x			x
D10Q1A4	Primary emotion when committing crime(s):	confident or brags about not getting caught	x									x
D10Q2A1	Primary purpose for committing crime(s):	anger | revenge
D10Q2A2	Primary purpose for committing crime(s):	impusle	x									x
D10Q2A3	Primary purpose for committing crime(s):	sexual desire	x									x			x
D10Q2A4	Primary purpose for committing crime(s):	money or material gain, including drugs	x									x			x
D10Q2A5	Primary purpose for committing crime(s):	excitement, amusement, or fun	x									x
D10Q2A6	Primary purpose for committing crime(s):	peer status, acceptance, or attention	x									x
D10Q3A1	Optimism:	high aspirations: sense of purpose, commitment to better life	x									x
D10Q3A2	Optimism:	normal aspirations: some sense of purpose	x									x
D10Q3A3	Optimism:	low aspirations: little sense of purpose or plans for better life	x									x
D10Q3A4	Optimism:	belives nothing matters; he or she will be dead before long	x									x
D10Q4A1	Impulsive; acts before thinking:	uses self-control; usually thinks before acting	x									x
D10Q4A2	Impulsive; acts before thinking:	some self-control; sometimes thinks before acting
D10Q4A3	Impulsive; acts before thinking:	impulsive; often acts before thinking
D10Q4A4	Impulsive; acts before thinking:	highly impulsive; usually acts before thinking
D10Q5A1	Belief in control over anti-social behavior:	belives he or she can avoid_stop anti-social behavior	x									x
D10Q5A2	Belief in control over anti-social behavior:	somewhat believes anti-social behavior is controllable
D10Q5A3	Belief in control over anti-social behavior:	believes his or her anti-social behavior is out of his or her control	x									x
D10Q6A1	Empathy, remorse, sympathy, or feelings for the	has empathy for his or her victim(s)
D10Q6A2	Empathy, remorse, sympathy, or feelings for the	has some empathy for his or her victim(s)	x									x
D10Q6A3	Empathy, remorse, sympathy, or feelings for the	does not have empathy for his or her victim(s)	x									x
D10Q7A1	Respect for property of others:	respects property of others	x									x
D10Q7A2	Respect for property of others:	respects personal property but not publicly accessible property: "its not hurting anybody"	x									x
D10Q7A3	Respect for property of others:	conditional respect for personal property: "if they are stupid enough to leave it out, they deserve losing it"	x									x
D10Q7A4	Respect for property of others:	no respect for property: "if I want something, it should be mine"
D10Q8A1	Respect for authority figures:	respects most authority figures
D10Q8A2	Respect for authority figures:	does not respect authority figures, and may resent someone	x									x
D10Q8A3	Respect for authority figures:	resents most authority figures	x									x			x
D10Q8A4	Respect for authority figures:	defies or is hostile toward most authority figures	x									x
D10Q9A1	Attitude toward responsible law abiding behavior	abides by conventions_values
D10Q9A2	Attitude toward responsible law abiding behavior	believes conventions_values sometime apply to him or her	x									x
D10Q9A3	Attitude toward responsible law abiding behavior	does not believe conventions_values apply to him or her	x									x
D10Q9A4	Attitude toward responsible law abiding behavior	resents or is hostile toward responsible behavior	x									x
D10Q10A1	Accepts responsibility for anti-social behavior:	accepts responsibility for anti-social behavior
D10Q10A2	Accepts responsibility for anti-social behavior:	minimizes, denies, justifies, excuses , or blames others	x									x
D10Q10A3	Accepts responsibility for anti-social behavior:	accepts anti-social behavior as okay	x									x
D10Q10A4	Accepts responsibility for anti-social behavior:	proud of anti-social behavior	x									x
D10Q11A1	Youths belief in successfully meeting conditions	believes he or she will be successful
D10Q11A2	Youths belief in successfully meeting conditions	usre if he or she will be successful	x									x
D10Q11A3	Youths belief in successfully meeting conditions	does not believe he or she will be successful	x									x			x
D11Q1A1	Tolerance for frustration:	rarely gets upset over small things or has temper tantrums
D11Q1A2	Tolerance for frustration:	sometimes gets upset over small things or has temper tantrums	x										x
D11Q1A3	Tolerance for frustration:	often gets upset over small things or has temper tantrums	x										x
D11Q2A1	Hostile interpretation of actions and intentions	primarily positive view of intentions of others
D11Q2A2	Hostile interpretation of actions and intentions	primarily negative view of intentions of others	x										x
D11Q2A3	Hostile interpretation of actions and intentions	primarily hostile view of intentions of others	x										x
D11Q3A1	Belief in yelling and verbal aggression to resol	believes verbal aggression is rarely appropriate
D11Q3A2	Belief in yelling and verbal aggression to resol	believes verbal aggression is sometimes appropriate	x										x
D11Q3A3	Belief in yelling and verbal aggression to resol	believes verbal aggression is often appropriate	x										x		x
D11Q4A1	Belief in fighting and physical aggression to re	believes physical aggression is never appropriate
D11Q4A2	Belief in fighting and physical aggression to re	believes physical aggression is rarely appropriate	x										x
D11Q4A3	Belief in fighting and physical aggression to re	believes physical aggression is sometimes appropriate	x										x
D11Q4A4	Belief in fighting and physical aggression to re	believes physical aggression is often appropriate	x										x
D11Q5A1	Reports_evidence of violence not included in cri	no reports_evidence of violence
D11Q5A2	Reports_evidence of violence not included in cri	violent outbursts, displays of temper, uncontrolled anger indicating potential for harm	x										x
D11Q5A3	Reports_evidence of violence not included in cri	deliberately inflicting physical pain	x										x
D11Q5A4	Reports_evidence of violence not included in cri	using_threatening with a weapon	x										x
D11Q5A5	Reports_evidence of violence not included in cri	fire starting	x										x		x
D11Q5A6	Reports_evidence of violence not included in cri	violent destruction of property	x										x		x
D11Q5A7	Reports_evidence of violence not included in cri	animal cruelty	x										x
D11Q6A1	Reports of problems with sexual aggression not i	no reports_evidence of sexual aggression
D11Q6A2	Reports of problems with sexual aggression not i	aggressive sex	x										x
D11Q6A3	Reports of problems with sexual aggression not i	sex for power	x										x
D11Q6A4	Reports of problems with sexual aggression not i	young sex partners	x										x		x
D11Q6A5	Reports of problems with sexual aggression not i	child sex	x										x
D11Q6A6	Reports of problems with sexual aggression not i	voyeurism	x										x
D11Q6A7	Reports of problems with sexual aggression not i	exposure	x										x		x
D12Q1A1	Consequential thinking:	does not understand there are consequences to actions
D12Q1A2	Consequential thinking:	understands there are consequences to actions	x											x
D12Q1A3	Consequential thinking:	identifies consequences of actions	x											x
D12Q1A4	Consequential thinking:	acts to obtain desired consequences-good consequential thinking	x											x
D12Q2A1	Goal setting:	does not set goals
D12Q2A2	Goal setting:	sets unrealistic goals	x											x	x
D12Q2A3	Goal setting:	sets somewhat realistic goals	x											x
D12Q2A4	Goal setting:	sets realistic goals	x											x
D12Q3A1	Problem-solving:	cannot identify problem behaviors	x											x
D12Q3A2	Problem-solving:	identifies problem behaviors
D12Q3A3	Problem-solving:	thinks of solutions for problem behaviors
D12Q3A4	Problem-solving:	applies appropriate solutions to problem behaviors
D12Q4A1	Situational perception:	cannt analyze the situation for use of a pro-social skill
D12Q4A2	Situational perception:	can analyze but not choose the best pro-social skill
D12Q4A3	Situational perception:	can choose the best skill but cannot select the best time and place
D12Q4A4	Situational perception:	can select the best time and place to use the best pro-social skill
D12Q5A1	Dealing with others: Basic social skills	lacks basic social skills in dealing with others
D12Q5A2	Dealing with others: Basic social skills	has basic social skills, lacks advanced skills in dealing with others
D12Q5A3	Dealing with others: Basic social skills	sometimes uses advanced social skills in dealing with others
D12Q5A4	Dealing with others: Basic social skills	often uses advanced social skills in dealing with others
D12Q6A1	Dealing with difficult situations:	lacks skills in dealing with difficult situations	x											x
D12Q6A2	Dealing with difficult situations:	rarely uses skills in dealing with difficult situations
D12Q6A3	Dealing with difficult situations:	sometimes uses skills in dealing with difficult situations
D12Q6A4	Dealing with difficult situations:	often uses skills in dealing with difficult situations
D12Q7A1	Dealing with feelings_emotions:	lacks skills in dealing with feelings_emotions
D12Q7A2	Dealing with feelings_emotions:	rarely uses skills in dealing with feelings_emotions	x											x
D12Q7A3	Dealing with feelings_emotions:	sometimes uses skills in dealing with feelings_emotions	x											x
D12Q7A4	Dealing with feelings_emotions:	often uses skills in dealing with feelings_emotions	x											x
D12Q8A1	Monitoring of internal triggers, distorted thoug	cannot identify internal triggers
D12Q8A2	Monitoring of internal triggers, distorted thoug	identifies internal triggers	x											x
D12Q8A3	Monitoring of internal triggers, distorted thoug	actively monitors internal triggers	x											x	x
D12Q9A1	Monitoring of external triggers, events or situa	cannot identify external triggers
D12Q9A2	Monitoring of external triggers, events or situa	identifies external triggers
D12Q9A3	Monitoring of external triggers, events or situa	actively monitors external triggers
D12Q10A1	Control of impulsive behaviors that get youth in	never had a problem with impulsive behavior	x											x
D12Q10A2	Control of impulsive behaviors that get youth in	does not know techniques to control implusive behavior
D12Q10A3	Control of impulsive behaviors that get youth in	knows techniques to control implusive behavior
D12Q10A4	Control of impulsive behaviors that get youth in	uses techniques to control impulsive behavior
D12Q11A1	Control of aggression:	never had a problem with aggression
D12Q11A2	Control of aggression:	lacks alternatives to aggression	x											x
D12Q11A3	Control of aggression:	rarely uses alternatives to aggression	x											x
D12Q11A4	Control of aggression:	sometimes uses alternatives to aggression	x											x
D12Q11A5	Control of aggression:	often uses alternatives to aggression	x											x
AGE			x
Note: "x" denoted variable is included in the model identified by column name.
